# Supplementary material for: Enhancing the light emission of GaAs nanowires by pressure-modulated charge transfer
Source: Royal Society of Chemistry journal article supplement (doi:10.1039/d0na00188k), 2020-01-01
Supplement: d0na00188k1.pdf [file d0na00188k1.pdf]

## Supplementary Information: Enhancing Light Emission of GaAs Nanowires by Pressure-Modulated Charge Transfer

Luoman Ma,<sup>a</sup> Peng Wang,<sup>\*a</sup> Xuotong Yin,<sup>a</sup> Yilan Liang,<sup>a</sup> Shuang Liu,<sup>a</sup> Lixia Li,<sup>b</sup>

Dong Pan,<sup>\*b</sup> Zhen Yao,<sup>a</sup> Bingbing Liu<sup>a</sup> and Jianhua Zhao<sup>b</sup>

<sup>a</sup> State Key Laboratory of Superhard Materials, Jilin University, Changchun 130012,  
China.

<sup>b</sup> State Key Laboratory of Superlattices and Microstructures, Institute of  
Semiconductors, Chinese Academy of Sciences, P.O. Box 912, Beijing 100083, China.

E-mail: wangpengtrrs@jlu.edu.cn

E-mail: pandong@semi.ac.cn

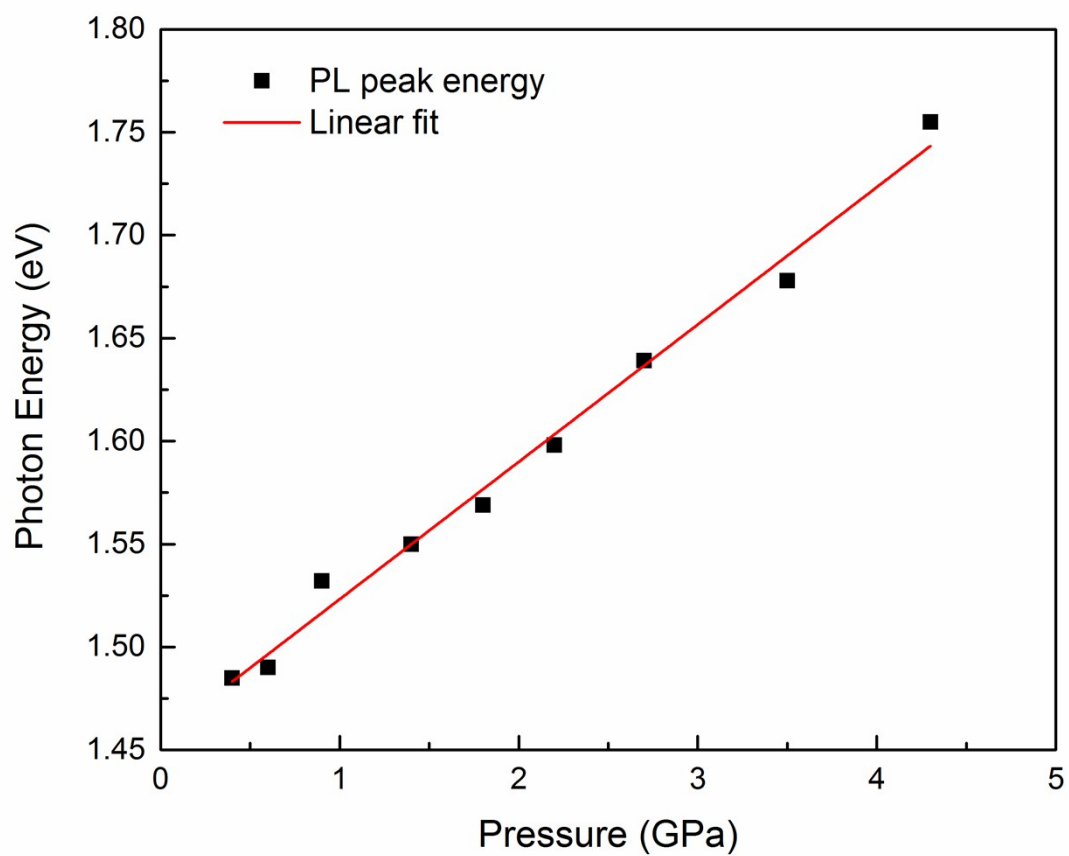

Fig. S1 Peak energy evolution of PL peaks in GaAs nanowires with no PTM fitting as a function of pressure upon compression from 0.4 GPa to 4.2 GPa.

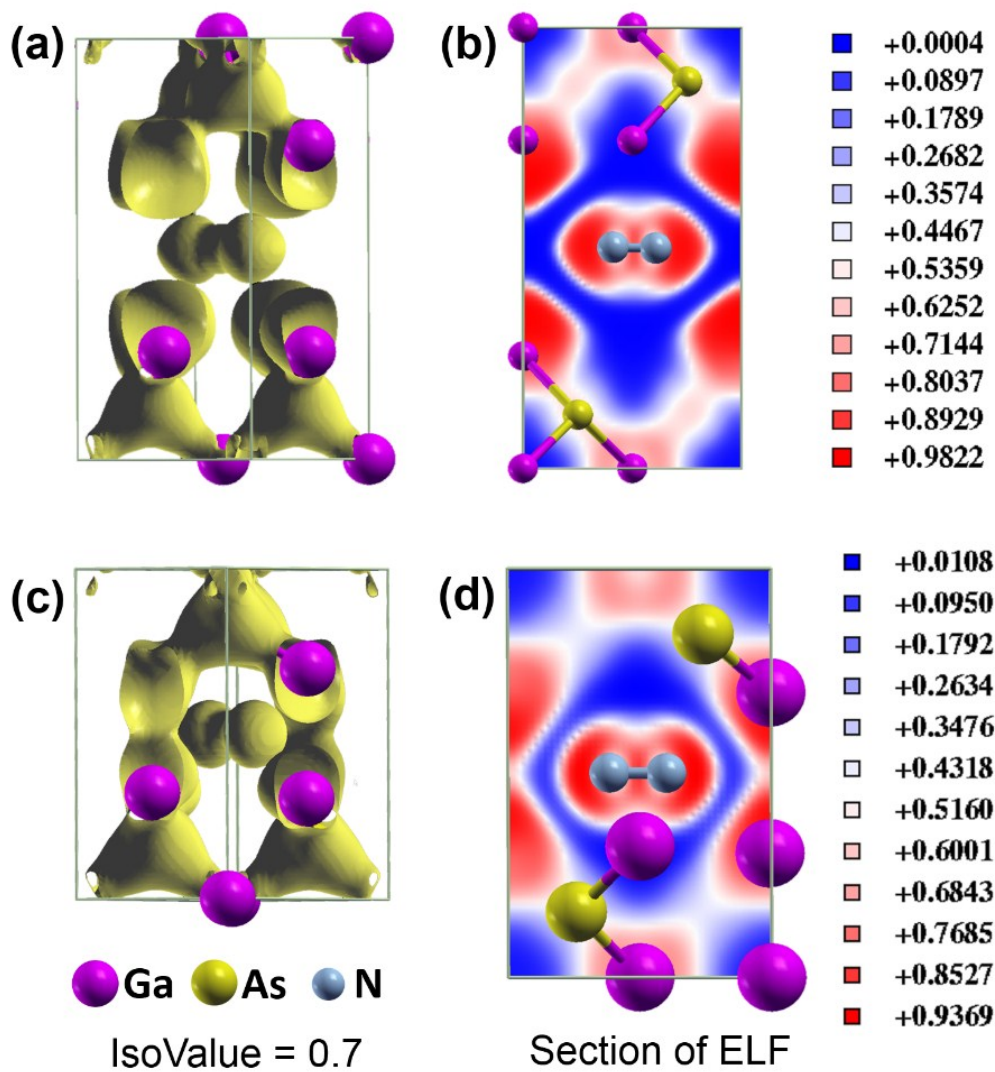

Fig. S2 ELF of the  $N_2@GaAs$  at (a) 0 GPa and correspond section (b), (c) 3 GPa and corresponding section (d). The IsoValue of ELF section is 0.7.
